# Supplementary material for: Subtyping of microsatellite stability colorectal cancer reveals guanylate binding protein 2 (GBP2) as a potential immunotherapeutic target
Source: J Immunother Cancer. 2022 Apr 5;10(4):e004302. doi: 10.1136/jitc-2021-004302 (PMC8984016; doi:10.1136/jitc-2021-004302)
Supplement: Supplementary data [file jitc-2021-004302supp005.xlsx]

## Sheet: Sheet1
A1CF
A2M
AADACP1
AADAT
AAED1
AASDHPPT
AB074162
ABAT
ABCA1
ABCA5
ABCA8
ABCB1
ABCB10
ABCB6
ABCC1
ABCC13
ABCC3
ABCC4
ABCC6
ABCD3
ABCE1
ABCG1
ABCG2
ABHD12
ABHD12B
ABHD13
ABHD14A
ABHD14A-ACY1
ABHD14B
ABHD17C
ABHD2
ABHD3
ABHD5
ABI2
ABI3BP
ABLIM1
ABLIM2
abParts
AC004951.6
AC006026.13
AC009237.8
AC024560.2
AC128677.4
ACAA2
ACAD11
ACADM
ACADS
ACADSB
ACADVL
ACAT1
ACAT2
ACBD5
ACD
ACE
ACE2
ACER3
ACKR1
ACKR3
ACN9
ACOT1
ACOT13
ACOT4
ACOT7
ACOX2
ACP5
ACP6
ACPP
ACSF2
ACSL1
ACSL4
ACSL5
ACSL6
ACSM3
ACSS1
ACSS2
ACTA2
ACTG1P4
ACTG2
ACTL10
ACTN1
ACTR3C
ACTR6
ACVR1B
ACVR1C
ACVRL1
ACYP1
ACYP2
ADA
ADAM12
ADAM19
ADAM1A
ADAM28
ADAM9
ADAMDEC1
ADAMTS1
ADAMTS10
ADAMTS12
ADAMTS15
ADAMTS2
ADAMTS5
ADAMTS6
ADAMTS9
ADAP1
ADAT2
ADCY3
ADCY9
ADH1B
ADH1C
ADH6
ADIRF
ADK
ADM
ADNP
ADORA2B
ADRA2A
ADRBK2
ADRM1
ADSL
ADTRP
AEBP1
AF001548.5
AF289551
AFAP1L2
AFG3L1P
AFG3L2
AGA
AGAP2-AS1
AGFG2
AGL
AGMAT
AGO2
AGO3
AGO4
AGPAT5
AGPAT9
AGPS
AGR2
AGR3
AGRN
AGT
AGTPBP1
AHCY
AHCYL2
AHI1
AHNAK
AHNAK2
AHR
AHSA2
AIF1
AIFM1
AIFM3
AIG1
AIM1
AIM1L
AIM2
AJUBA
AK021804
AK021977
AK022030
AK022793
AK023627
AK025288
AK025975
AK026714
AK057259
AK057978
AK1
AK126278
AK4
AKAP11
AKAP12
AKAP13
AKAP2
AKAP7
AKAP9
AKR1B1
AKR1B10
AKR1C1
AKR1C2
AKR1C3
AKR7A2
AKR7A3
AKT3
AL833181
AL928768.3
ALCAM
ALDH1A1
ALDH1A3
ALDH1B1
ALDH1L1
ALDH3A1
ALDH3A2
ALDH4A1
ALDH5A1
ALDH6A1
ALDH7A1
ALDOB
ALDOC
ALG10
ALG13
ALG14
ALKBH2
ALKBH3
ALKBH7
ALOX5
ALOX5AP
ALPK3
ALYREF
AMACR
AMICA1
AMIGO2
AMMECR1
AMN
AMOTL1
AMOTL2
AMPD3
AMT
AMZ2P1
ANAPC10
ANG
ANGPT2
ANGPTL2
ANK3
ANKEF1
ANKH
ANKMY2
ANKRA2
ANKRD10
ANKRD10-IT1
ANKRD12
ANKRD13B
ANKRD13C
ANKRD18A
ANKRD20A1
ANKRD22
ANKRD29
ANKRD32
ANKRD36
ANKRD36B
ANKRD36BP2
ANKRD37
ANKRD44
ANKRD46
ANKRD50
ANKRD9
ANKS4B
ANLN
ANO1
ANO6
ANO9
ANP32E
ANPEP
ANTXR1
ANTXR2
ANXA1
ANXA13
ANXA3
ANXA5
ANXA6
ANXA9
AOAH
AOC1
AOC3
AP000525.9
AP1AR
AP1S1
AP1S2
AP1S3
AP5M1
APAF1
APBB1IP
APBB2
APC
APCDD1
APEH
APIP
APITD1
APLNR
APMAP
APOBEC1
APOBEC3B
APOBEC3C
APOBEC3G
APOBR
APOC1
APOC2
APOD
APOE
APOL1
APOL3
APOO
APOOL
APPL1
APPL2
APRT
APTR
AQP1
AQP11
AQP3
AQP8
AQP9
ARAP2
ARAP3
AREG
ARFGAP3
ARFGEF1
ARFGEF2
ARG2
ARGLU1
ARHGAP11A
ARHGAP11B
ARHGAP15
ARHGAP18
ARHGAP23
ARHGAP24
ARHGAP29
ARHGAP31
ARHGAP32
ARHGAP4
ARHGAP42
ARHGAP44
ARHGAP5
ARHGAP6
ARHGAP8
ARHGAP9
ARHGDIB
ARHGEF10
ARHGEF26
ARHGEF37
ARHGEF40
ARHGEF6
ARID3A
ARID5B
ARL13B
ARL14
ARL14EP
ARL15
ARL4C
ARL5B
ARMCX1
ARMCX2
ARMCX3
ARMCX5
ARMCX5-GPRASP2
ARNT2
ARNTL2
ARRDC3
ARRDC4
ARSA
ARSD
ARSE
ARSJ
ART3
ARV1
ASAP1
ASB7
ASB9
ASCC3
ASCL2
ASF1A
ASF1B
ASL
ASMTL
ASNS
ASPH
ASPHD1
ASPHD2
ASPM
ASPN
ASPSCR1
ASRGL1
ASS1
ASUN
ASXL1
ATAD2
ATAD2B
ATE1
ATF1
ATF3
ATF7IP2
ATHL1
ATL1
ATL3
ATM
ATOH1
ATP10B
ATP10D
ATP11A
ATP11B
ATP11C
ATP13A3
ATP1B1
ATP2A3
ATP2B1
ATP2B4
ATP2C2
ATP5D
ATP5S
ATP6AP1L
ATP6V0E2
ATP6V1B2
ATP6V1C1
ATP6V1C2
ATP7A
ATP7B
ATP8A1
ATP8B1
ATP8B2
ATP9A
ATR
ATRN
ATRX
ATXN1
AUNIP
AURKA
AURKB
AUTS2
AVEN
AVL9
AVPI1
AX746823
AX747132
AX747730
AX747826
AX748273
AXDND1
AXIN2
AXL
AZGP1
B3GALNT1
B3GALT5
B3GNT5
B3GNT6
B3GNT7
B3GNT8
B4GALNT3
B4GALT6
BACE2
BACH1
BAG2
BAG4
BAIAP2L1
BAK1
BAMBI
BARD1
BASP1
BATF
BATF2
BAX
BAZ1A
BAZ2B
BBIP1
BBS12
BBS7
BBX
BC005081
BC017398
BC022047
BC022892
BC041025
BC065766
BC070363
BCAP29
BCAR3
BCAS1
BCAT1
BCAT2
BCCIP
BCL11A
BCL11B
BCL2A1
BCL2L12
BCL2L14
BCL2L15
BCL3
BCL6
BCMO1
BCOR
BD495725
BDH1
BDH2
BDKRB2
BDP1
BEND7
BEST2
BEX2
BEX4
BEX5
BGN
BHLHB9
BHLHE22
BHLHE40
BHLHE41
BICC1
BICD2
BID
BIK
BIN3
BIRC3
BIRC5
BIVM
BLACAT1
BLM
BLNK
BLOC1S6
BLVRA
BLVRB
BLZF1
BMP2
BMP2K
BMP4
BMP5
BMPR2
BMS1P20
BMS1P5
BMS1P6
BNC2
BNIP2
BNIP3
BNIP3L
BOK
BOP1
BORA
BPGM
BPNT1
BRCA1
BRCA2
BRCC3
BRD3
BRI3BP
BRIP1
BRPF3
BSG
BSPRY
BST1
BST2
BTAF1
BTBD11
BTBD3
BTC
BTG2
BTG3
BTN3A2
BTN3A3
BTNL3
BTNL8
BUB1
BUB1B
C10orf10
C10orf11
C10orf128
C10orf2
C10orf54
C10orf99
C11orf1
C11orf52
C11orf54
C11orf71
C11orf74
C11orf83
C11orf95
C11orf96
C12orf29
C12orf5
C12orf57
C12orf66
C12orf73
C12orf75
C14orf132
C14orf142
C14orf159
C15orf40
C15orf48
C15orf52
C15orf65
C16orf54
C16orf62
C16orf87
C17orf75
C17orf89
C17orf96
C17orf97
C18orf25
C18orf54
C19orf33
C19orf48
C1GALT1
C1GALT1C1
C1orf106
C1orf112
C1orf115
C1orf116
C1orf131
C1orf162
C1orf21
C1orf210
C1orf216
C1orf226
C1orf233
C1orf27
C1orf53
C1orf54
C1orf85
C1QA
C1QB
C1QBP
C1QC
C1QTNF3
C1QTNF5
C1R
C1RL
C1S
C2
C20orf196
C20orf27
C21orf91
C22orf39
C2CD4A
C2CD5
C2orf72
C2orf76
C2orf82
C2orf88
C3
C3AR1
C3orf14
C3orf52
C3orf70
C3orf80
C4A
C4BPA
C4BPB
C4orf19
C4orf3
C4orf32
C4orf33
C5AR1
C5orf28
C5orf30
C5orf34
C5orf46
C6orf120
C6orf123
C6orf132
C6orf136
C6orf141
C6orf203
C6orf211
C6orf57
C7
C7orf13
C7orf31
C7orf50
C7orf55
C7orf60
C8orf33
C8orf4
C8orf44-SGK3
C8orf59
C8orf76
C8orf82
C9orf152
C9orf16
C9orf3
C9orf40
C9orf41
C9orf72
CA1
CA12
CA13
CA2
CA4
CA8
CA9
CAB39L
CABLES2
CACHD1
CACNA1D
CACNA2D2
CAD
CADM1
CADPS
CADPS2
CALB2
CALCRL
CALD1
CALHM2
CALML4
CAMK1D
CAMK2D
CAMK2N1
CAMKK2
CAMKMT
CAMSAP2
CAMSAP3
CAP2
CAPG
CAPN12
CAPN13
CAPN15
CAPN3
CAPN5
CAPN6
CAPN8
CAPN9
CAPRIN2
CARD10
CARD16
CARD6
CARD8
CARM1
CASC5
CASD1
CASK
CASP1
CASP4
CASP5
CASP6
CASP7
CASP8AP2
CAST
CAT
CATSPERB
CAV1
CAV2
CBFA2T2
CBLB
CBLC
CBR1
CBR3
CBR4
CBX2
CBX4
CBX5
CBX6
CC2D1A
CC2D2A
CCAR1
CCAR2
CCDC104
CCDC109B
CCDC113
CCDC117
CCDC125
CCDC126
CCDC132
CCDC134
CCDC137
CCDC14
CCDC146
CCDC152
CCDC167
CCDC170
CCDC186
CCDC22
CCDC25
CCDC3
CCDC34
CCDC53
CCDC58
CCDC64B
CCDC68
CCDC69
CCDC71L
CCDC77
CCDC80
CCDC85B
CCDC85C
CCDC86
CCDC88A
CCDC88C
CCDC91
CCDC92
CCL11
CCL13
CCL14
CCL15
CCL18
CCL19
CCL2
CCL20
CCL21
CCL24
CCL28
CCL3
CCL4
CCL5
CCL8
CCNA2
CCNB1
CCNB1IP1
CCNB2
CCNC
CCND1
CCND2
CCNDBP1
CCNE1
CCNE2
CCNF
CCNG1
CCNG2
CCNJ
CCNL1
CCNL2
CCNO
CCNT2
CCNYL1
CCPG1
CCR1
CCR2
CCR7
CCRL2
CCSAP
CCSER2
CCT6P1
CCZ1B
CD109
CD14
CD163
CD163L1
CD177
CD1D
CD2
CD200
CD247
CD248
CD27
CD2AP
CD300A
CD300LF
CD302
CD320
CD36
CD37
CD38
CD3D
CD3EAP
CD44
CD48
CD52
CD53
CD55
CD58
CD59
CD69
CD74
CD79A
CD84
CD86
CD8A
CD93
CD99
CDA
CDADC1
CDC14B
CDC20
CDC25A
CDC25B
CDC25C
CDC37L1
CDC42
CDC42BPB
CDC42EP1
CDC42EP3
CDC42EP5
CDC45
CDC6
CDC7
CDCA2
CDCA3
CDCA4
CDCA5
CDCA7
CDCA7L
CDCA8
CDH11
CDH17
CDH3
CDH5
CDHR1
CDHR2
CDHR5
CDIP1
CDK1
CDK13
CDK19
CDK2
CDK2AP2
CDK4
CDK5
CDK5RAP1
CDK6
CDK7
CDK8
CDK9
CDKAL1
CDKN1A
CDKN1B
CDKN1C
CDKN2A
CDKN2B
CDKN3
CDR2L
CDS1
CDS2
CDT1
CDX2
CDYL2
CEACAM1
CEACAM6
CEACAM7
CEBPA
CEBPB
CEBPD
CEBPZOS
CECR1
CEL
CELF2
CELP
CELSR1
CELSR3
CEMIP
CENPA
CENPB
CENPC
CENPE
CENPF
CENPH
CENPI
CENPJ
CENPK
CENPM
CENPN
CENPQ
CENPU
CENPV
CENPW
CEP120
CEP135
CEP152
CEP170
CEP192
CEP290
CEP41
CEP44
CEP55
CEP68
CEP70
CEP72
CEP76
CEP83
CEP85L
CEP95
CEP97
CERCAM
CERK
CERS6
CES1
CES2
CES3
CETN3
CFB
CFD
CFH
CFI
CFL2
CFTR
CGN
CGNL1
CGREF1
CGRRF1
CH25H
CHAC2
CHCHD10
CHCHD5
CHCHD7
CHD1
CHD6
CHD7
CHD9
CHDH
CHEK1
CHEK2
CHFR
CHGA
CHI3L1
CHIC1
CHIC2
CHKA
CHKB-CPT1B
CHM
CHML
CHMP4C
CHN1
CHN2
CHORDC1
CHP2
CHRDL1
CHRDL2
CHRFAM7A
CHRM3
CHRNA5
CHST11
CHST15
CHST2
CHST3
CHST5
CHST7
CHSY1
CHSY3
CHTF18
CIB1
CIB2
CILP
CIPC
CIRBP
CIT
CITED2
CKAP2
CKAP2L
CKAP4
CKB
CKLF
CKMT1A
CKMT2
CKMT2-AS1
CKS1B
CKS2
CLC
CLCA1
CLCA4
CLCN2
CLCN3
CLCN5
CLDN1
CLDN12
CLDN15
CLDN2
CLDN23
CLDN3
CLDN4
CLDN7
CLEC10A
CLEC11A
CLEC2B
CLEC3B
CLEC4A
CLEC5A
CLEC7A
CLHC1
CLIC2
CLIC3
CLIC4
CLIC5
CLIC6
CLIP3
CLIP4
CLK1
CLK4
CLMN
CLMP
CLN5
CLOCK
CLRN3
CLTB
CLU
CLYBL
CMAHP
CMAS
CMC4
CMPK1
CMPK2
CMSS1
CMTM3
CMTM4
CMTM7
CMTM8
CMTR2
CNGA1
CNIH3
CNKSR3
CNN1
CNN3
CNNM4
CNOT3
CNOT7
CNRIP1
CNTN3
CNTNAP2
COA1
COBL
COBLL1
COCH
COG3
COG6
COIL
COL10A1
COL11A1
COL12A1
COL14A1
COL15A1
COL16A1
COL17A1
COL18A1
COL1A1
COL1A2
COL21A1
COL27A1
COL3A1
COL4A1
COL4A2
COL4A5
COL5A1
COL5A2
COL6A1
COL6A2
COL6A3
COL7A1
COL8A1
COL9A2
COL9A3
COLCA2
COLEC12
COMMD10
COMMD7
COMMD8
COMP
COMTD1
COPG1
COPG2
COPRS
COPS2
COPZ2
COQ2
COQ3
CORO1A
CORO1C
CORO2A
COTL1
COX11
COX3
COX7A1
CPA3
CPA6
CPD
CPE
CPEB2
CPEB4
CPED1
CPLX1
CPM
CPNE1
CPNE2
CPNE5
CPNE7
CPNE8
CPPED1
CPQ
CPSF1
CPT1A
CPT2
CPVL
CPXM1
CPXM2
CPZ
CR2
CREB3L1
CREBRF
CREBZF
CREM
CRIM1
CRIP1
CRIP2
CRIPAK
CRISPLD1
CRISPLD2
CRLS1
CRNDE
CRNKL1
CROCCP2
CRYAB
CRYBG3
CRYL1
CRYM
CRYZ
CSE1L
CSF1R
CSF2RB
CSGALNACT1
CSGALNACT2
CSNK1G3
CSNK2A1
CSPP1
CSRNP1
CSRP1
CSRP2
CSRP2BP
CST1
CST2
CST3
CST4
CST7
CSTA
CSTF1
CTA-29F11.1
CTAGE15
CTAGE4
CTB-31O20.2
CTB-50L17.7
CTBS
CTC-338M12.4
CTC-428G20.3
CTC-444N24.11
CTD-2165H16.3
CTD-2292M16.8
CTD-2325A15.5
CTD-2377D24.6
CTD-3092A11.2
CTDSPL2
CTGF
CTH
CTHRC1
CTNNAL1
CTNNB1
CTNNBL1
CTPS1
CTPS2
CTSA
CTSD
CTSE
CTSF
CTSH
CTSK
CTSL
CTSO
CTSS
CTSV
CTSZ
CTTNBP2
CUL5
CWC27
CWF19L2
CWH43
CXADR
CXCL1
CXCL10
CXCL11
CXCL12
CXCL13
CXCL14
CXCL16
CXCL2
CXCL3
CXCL5
CXCL6
CXCL8
CXCL9
CXCR2
CXCR4
CXorf23
CXorf24
CXorf38
CXorf57
CXXC4
CYAT1
CYB5B
CYB5D2
CYB5R2
CYB5R4
CYBA
CYBB
CYBRD1
CYC1
CYFIP2
CYGB
CYLD
CYP11B2
CYP1B1
CYP27A1
CYP2B6
CYP2C18
CYP2J2
CYP2S1
CYP2W1
CYP39A1
CYP3A5
CYP4F11
CYP4F12
CYP4F2
CYP4F3
CYP4V2
CYP4X1
CYP51A1
CYR61
CYSLTR1
CYSTM1
CYTIP
CYYR1
DAAM1
DAB1
DAB2
DACH1
DACT1
DANCR
DAPK1
DAPK2
DAPL1
DAPP1
DBF4
DBN1
DCAF13
DCAF16
DCAF17
DCAKD
DCBLD1
DCBLD2
DCDC2
DCHS1
DCK
DCLRE1A
DCLRE1B
DCN
DCP2
DCTN6
DCUN1D4
DCUN1D5
DDAH2
DDB2
DDC
DDHD1
DDHD2
DDI2
DDIAS
DDIT3
DDIT4
DDR2
DDRGK1
DDT
DDX21
DDX26B
DDX27
DDX39A
DDX3Y
DDX52
DDX55
DDX58
DDX60
DDX60L
DEFA5
DEFA6
DEFB1
DEGS1
DEGS2
DENND1B
DENND2A
DENND4C
DENND5A
DENND5B
DEPDC1
DEPDC1B
DEPDC7
DEPTOR
DERL3
DES
DESI1
DFFB
DFNA5
DGAT1
DGAT2
DGKA
DGKE
DGKH
DGKQ
DGKZ
DHCR24
DHCR7
DHFR
DHRS1
DHRS11
DHRS4
DHRS4-AS1
DHRS7
DHRS7B
DHRS9
DHX35
DHX36
DHX40
DIAPH2
DIAPH3
DICER1
DIDO1
DIO2
DIO3OS
DIP2C
DIRC2
DIS3
DISP2
DIXDC1
DKC1
DKFZP586I1420
DKK2
DKK3
DLAT
DLC1
DLEU1
DLEU2
DLGAP1-AS2
DLGAP5
DLL1
DMBT1
DMD
DMKN
DMTF1
DMTN
DMXL1
DMXL2
DNA2
DNAAF2
DNAH14
DNAJB1
DNAJB14
DNAJB4
DNAJB9
DNAJC10
DNAJC12
DNAJC15
DNAJC2
DNAJC3-AS1
DNAJC6
DNALI1
DNASE1L3
DNLZ
DNM1
DNMT1
DNMT3B
DNTTIP1
DOCK10
DOCK11
DOCK2
DOCK4
DOCK5
DOCK8
DOCK9
DOK4
DONSON
DOPEY2
DPEP1
DPH3
DPH6
DPM1
DPM3
DPP4
DPT
DPY19L1
DPY19L3
DPY19L4
DPYD
DPYSL2
DPYSL3
DQ597730
DQX1
DRAM1
DSC2
DSC3
DSCC1
DSE
DSERG1
DSG3
DSN1
DST
DTD1
DTD2
DTL
DTWD1
DTX3
DTYMK
DUOX2
DUOXA2
DUS3L
DUS4L
DUSP1
DUSP10
DUSP14
DUSP16
DUSP18
DUSP2
DUSP27
DUSP4
DUSP5
DUSP6
DUXAP10
DVL3
DYNC2LI1
DYNLRB1
DYNLT3
DYRK4
DZANK1
DZIP3
E2F3
E2F5
E2F7
E2F8
EAF1
EAF2
EAPP
EBAG9
EBF1
EBLN3
EBNA1BP2
EBP
EBPL
ECE2
ECHDC1
ECHDC3
ECI1
ECI2
ECM1
ECM2
ECT2
EDA
EDAR
EDEM3
EDIL3
EDN1
EDN3
EDNRA
EDNRB
EDRF1
EEA1
EEF1E1
EEPD1
EFCAB11
EFCAB2
EFCAB4B
EFCAB7
EFEMP1
EFEMP2
EFHC1
EFNA1
EFNA2
EFNA3
EFNA4
EFNA5
EFNB2
EGFL6
EGFR
EGLN3
EGR1
EGR2
EGR3
EHD2
EHF
EHHADH
EHMT2
EID1
EIF1AX
EIF1AY
EIF2AK4
EIF2S2
EIF4E
EIF4E3
EIF4EBP1
EIF5A
EIF5A2
EIF5B
EIF6
ELAVL2
ELFN1-AS1
ELK3
ELK4
ELL2
ELL3
ELMO1
ELMO2
ELMO3
ELN
ELOVL5
ELOVL6
ELOVL7
ELTD1
EMB
EMC2
EMC3-AS1
EMCN
EME1
EMILIN1
EMILIN2
EMILIN3
EML1
EMP1
EMP2
EMP3
ENAH
ENC1
ENDOD1
ENDOG
ENG
ENO2
ENOSF1
ENOX2
ENPEP
ENPP1
ENPP2
ENPP3
ENPP4
ENPP5
ENTPD1
ENTPD2
ENTPD4
ENTPD5
ENTPD6
ENY2
EOGT
EP300-AS1
EPAS1
EPB41L1
EPB41L2
EPB41L3
EPB41L4A
EPB41L4A-AS1
EPB41L4B
EPB41L5
EPDR1
EPHA1
EPHA2
EPHA3
EPHA4
EPHB2
EPHB3
EPHB4
EPHX1
EPHX2
EPHX4
EPM2AIP1
EPN3
EPPK1
EPS8
EPS8L3
EPSTI1
EPYC
ERAP1
ERAP2
ERBB3
ERCC6L
EREG
ERGIC1
ERGIC3
ERI1
ERI2
ERLIN2
ERN1
ERN2
ERO1L
ERP27
ERRFI1
ERVK13-1
ESAM
ESCO1
ESF1
ESM1
ESPN
ETFA
ETFDH
ETHE1
ETNK1
ETS1
ETS2
ETV4
ETV5
EVA1A
EVA1C
EVI2A
EVI2B
EVL
EVPL
EXO1
EXOSC3
EXOSC4
EXOSC5
EXOSC8
EXPH5
EXTL2
EZH2
F12
F13A1
F2R
F2RL1
F2RL2
F3
F5
F8
FA2H
FAAH2
FABP1
FABP4
FABP5
FABP6
FADS1
FADS2
FAH
FAHD1
FAIM
FAIM3
FAM101A
FAM101B
FAM102B
FAM103A1
FAM105A
FAM107B
FAM110C
FAM114A1
FAM115A
FAM117B
FAM120C
FAM122B
FAM126A
FAM126B
FAM127A
FAM127B
FAM129A
FAM132A
FAM134B
FAM135A
FAM13A
FAM13A-AS1
FAM13B
FAM13C
FAM149A
FAM150B
FAM161A
FAM162A
FAM169A
FAM171A1
FAM171B
FAM172A
FAM174A
FAM175A
FAM177A1
FAM179B
FAM185A
FAM189A1
FAM198B
FAM199X
FAM200A
FAM201A
FAM208B
FAM20C
FAM210B
FAM213A
FAM213B
FAM214A
FAM216A
FAM217B
FAM221A
FAM222A
FAM226A
FAM228B
FAM229B
FAM231D
FAM24B
FAM26F
FAM3B
FAM3C
FAM3D
FAM43A
FAM46A
FAM46C
FAM47E
FAM49A
FAM50B
FAM57A
FAM63B
FAM64A
FAM65C
FAM69A
FAM72A
FAM73A
FAM76B
FAM83B
FAM83D
FAM83E
FAM83F
FAM83H
FAM84A
FAM84B
FAM89A
FAM8A1
FAM91A1
FAM92A1
FAM98B
FANCA
FANCD2
FANCF
FANCI
FANCL
FAP
FAR1
FAR2
FAR2P2
FARP1
FARSA
FAS
FASN
FASTKD1
FASTKD3
FASTKD5
FAT1
FAT4
FBLN1
FBLN2
FBLN5
FBN1
FBN2
FBP1
FBRSL1
FBXL16
FBXL2
FBXL3
FBXL4
FBXL6
FBXL7
FBXO16
FBXO22
FBXO25
FBXO3
FBXO32
FBXO4
FBXO41
FBXO45
FBXO5
FBXO6
FBXO8
FCER1G
FCF1
FCGBP
FCGR1A
FCGR1B
FCGR2A
FCGR2B
FCGR2C
FCGR3A
FCGR3B
FCGRT
FCHO2
FCHSD2
FDCSP
FDFT1
FDPS
FDXR
FECH
FEM1C
FEN1
FER1L4
FERMT1
FERMT2
FERMT3
FEZ1
FFAR4
FGD4
FGD6
FGF13
FGF7
FGF9
FGFBP1
FGFR1
FGFR1OP
FGFR2
FGFR3
FGFR4
FGFRL1
FGGY
FGL2
FHDC1
FHIT
FHL1
FHL2
FHOD3
FIBCD1
FIBIN
FIGNL1
FILIP1L
FITM2
FJX1
FKBP10
FKBP11
FKBP14
FKBP1A
FKBP1A-SDCBP2
FKBP1B
FKBP3
FKBP5
FKBP7
FKTN
FLI1
FLJ16734
FLJ22763
FLJ23867
FLJ31306
FLJ32255
FLJ37453
FLNA
FLRT2
FLRT3
FLVCR1
FLVCR1-AS1
FMNL2
FMO5
FMOD
FMR1
FN1
FNBP1
FNBP1L
FNBP4
FNDC1
FNDC3A
FNDC3B
FNIP2
FOCAD
FOLR1
FOS
FOSB
FOSL1
FOSL2
FOXA1
FOXA2
FOXA3
FOXD1
FOXD2
FOXF1
FOXF2
FOXJ1
FOXK1
FOXM1
FOXN2
FOXO1
FOXO3
FOXP1
FOXP2
FOXP4
FOXQ1
FPGT
FPR1
FPR3
FRA10AC1
FRAS1
FREM1
FREM2
FRG1B
FRK
FRMD3
FRMD4B
FRMD5
FRMD6
FRS2
FRY
FRYL
FRZB
FSCN1
FSD1L
FSTL1
FSTL3
FTX
FUCA1
FUNDC1
FUNDC2
FUOM
FUT1
FUT11
FUT2
FUT3
FUT4
FUT6
FUT8
FXN
FXR1
FXYD1
FXYD3
FXYD5
FXYD6
FYB
FYN
FZD1
FZD10
FZD3
FZD5
FZD6
FZD7
FZD8
G0S2
G2E3
G6PD
GAA
GAB1
GABARAPL1
GABBR1
GABPA
GABPB1-AS1
GABRA2
GABRE
GABRP
[truncated: 4,238 more rows]
