# Supplementary material for: Subtyping of microsatellite stability colorectal cancer reveals guanylate binding protein 2 (GBP2) as a potential immunotherapeutic target
Source: J Immunother Cancer. 2022 Apr 5;10(4):e004302. doi: 10.1136/jitc-2021-004302 (PMC8984016; doi:10.1136/jitc-2021-004302)
Supplement: Supplementary data [file jitc-2021-004302supp010.xlsx]

## Sheet: Supplementary Table 3
	Metagene	Cell.type
1	ADAM28	Activated B cell
2	CD180	Activated B cell
3	CD79B	Activated B cell
4	BLK	Activated B cell
5	CD19	Activated B cell
6	MS4A1	Activated B cell
7	TNFRSF17	Activated B cell
8	IGHM	Activated B cell
9	GNG7	Activated B cell
10	MICAL3	Activated B cell
11	SPIB	Activated B cell
12	HLA-DOB	Activated B cell
13	IGKC	Activated B cell
14	PNOC	Activated B cell
15	FCRL2	Activated B cell
16	BACH2	Activated B cell
17	CR2	Activated B cell
18	TCL1A	Activated B cell
19	AKNA	Activated B cell
20	ARHGAP25	Activated B cell
21	CCL21	Activated B cell
22	CD27	Activated B cell
23	CD38	Activated B cell
24	CLEC17A	Activated B cell
25	CLEC9A	Activated B cell
26	CLECL1	Activated B cell
27	AIM2	Activated CD4 T cell
28	BIRC3	Activated CD4 T cell
29	BRIP1	Activated CD4 T cell
30	CCL20	Activated CD4 T cell
31	CCL4	Activated CD4 T cell
32	CCL5	Activated CD4 T cell
33	CCNB1	Activated CD4 T cell
34	CCR7	Activated CD4 T cell
35	DUSP2	Activated CD4 T cell
36	ESCO2	Activated CD4 T cell
37	ETS1	Activated CD4 T cell
38	EXO1	Activated CD4 T cell
39	EXOC6	Activated CD4 T cell
40	IARS	Activated CD4 T cell
41	ITK	Activated CD4 T cell
42	KIF11	Activated CD4 T cell
43	KNTC1	Activated CD4 T cell
44	NUF2	Activated CD4 T cell
45	PRC1	Activated CD4 T cell
46	PSAT1	Activated CD4 T cell
47	RGS1	Activated CD4 T cell
48	RTKN2	Activated CD4 T cell
49	SAMSN1	Activated CD4 T cell
50	SELL	Activated CD4 T cell
51	TRAT1	Activated CD4 T cell
52	ADRM1	Activated CD8 T cell
53	AHSA1	Activated CD8 T cell
54	C1GALT1C1	Activated CD8 T cell
55	CCT6B	Activated CD8 T cell
56	CD37	Activated CD8 T cell
57	CD3D	Activated CD8 T cell
58	CD3E	Activated CD8 T cell
59	CD3G	Activated CD8 T cell
60	CD69	Activated CD8 T cell
61	CD8A	Activated CD8 T cell
62	CETN3	Activated CD8 T cell
63	CSE1L	Activated CD8 T cell
64	GEMIN6	Activated CD8 T cell
65	GNLY	Activated CD8 T cell
66	GPT2	Activated CD8 T cell
67	GZMA	Activated CD8 T cell
68	GZMH	Activated CD8 T cell
69	GZMK	Activated CD8 T cell
70	IL2RB	Activated CD8 T cell
71	LCK	Activated CD8 T cell
72	MPZL1	Activated CD8 T cell
73	NKG7	Activated CD8 T cell
74	PIK3IP1	Activated CD8 T cell
75	PTRH2	Activated CD8 T cell
76	TIMM13	Activated CD8 T cell
77	ZAP70	Activated CD8 T cell
78	ABHD3	Central memory CD4 T cell
79	AHNAK	Central memory CD4 T cell
80	ANXA2P2	Central memory CD4 T cell
81	AQP3	Central memory CD4 T cell
82	ATHL1	Central memory CD4 T cell
83	BMI1	Central memory CD4 T cell
84	BZW2	Central memory CD4 T cell
85	CD63	Central memory CD4 T cell
86	COL4A1	Central memory CD4 T cell
87	CYLD	Central memory CD4 T cell
88	ELMO2	Central memory CD4 T cell
89	FYN	Central memory CD4 T cell
90	GLIPR1	Central memory CD4 T cell
91	GSS	Central memory CD4 T cell
92	IFITM2	Central memory CD4 T cell
93	ITGB1	Central memory CD4 T cell
94	ITGB2	Central memory CD4 T cell
95	KLF5	Central memory CD4 T cell
96	LSP1	Central memory CD4 T cell
97	NDUFB9	Central memory CD4 T cell
98	PKM2	Central memory CD4 T cell
99	SFXN3	Central memory CD4 T cell
100	SIRPG	Central memory CD4 T cell
101	SMAD4	Central memory CD4 T cell
102	STX4	Central memory CD4 T cell
103	TRADD	Central memory CD4 T cell
104	VIM	Central memory CD4 T cell
105	XRCC6	Central memory CD4 T cell
106	ACTN4	Central memory CD8 T cell
107	ADAM12	Central memory CD8 T cell
108	ADCY9	Central memory CD8 T cell
109	F13A1	Central memory CD8 T cell
110	FCER1G	Central memory CD8 T cell
111	FCGR3B	Central memory CD8 T cell
112	FGF7	Central memory CD8 T cell
113	FKBP4	Central memory CD8 T cell
114	GLUD1	Central memory CD8 T cell
115	GM2A	Central memory CD8 T cell
116	GUSB	Central memory CD8 T cell
117	IL1RN	Central memory CD8 T cell
118	NOL11	Central memory CD8 T cell
119	NTRK1	Central memory CD8 T cell
120	RARA	Central memory CD8 T cell
121	RNF128	Central memory CD8 T cell
122	SIGLEC1	Central memory CD8 T cell
123	TNFRSF11A	Central memory CD8 T cell
124	TOX4	Central memory CD8 T cell
125	UBA52	Central memory CD8 T cell
126	ULBP1	Central memory CD8 T cell
127	ATM	Effector memeory CD4 T cell
128	CASP3	Effector memeory CD4 T cell
129	CASQ1	Effector memeory CD4 T cell
130	CD300E	Effector memeory CD4 T cell
131	DARS	Effector memeory CD4 T cell
132	DOCK9	Effector memeory CD4 T cell
133	EXOSC9	Effector memeory CD4 T cell
134	EZH2	Effector memeory CD4 T cell
135	GDE1	Effector memeory CD4 T cell
136	IL34	Effector memeory CD4 T cell
137	NCOA4	Effector memeory CD4 T cell
138	NEFL	Effector memeory CD4 T cell
139	PDGFRL	Effector memeory CD4 T cell
140	PTGS1	Effector memeory CD4 T cell
141	REPS1	Effector memeory CD4 T cell
142	SCG2	Effector memeory CD4 T cell
143	SDPR	Effector memeory CD4 T cell
144	SIGLEC14	Effector memeory CD4 T cell
145	SIGLEC6	Effector memeory CD4 T cell
146	TAL1	Effector memeory CD4 T cell
147	TFEC	Effector memeory CD4 T cell
148	TIPIN	Effector memeory CD4 T cell
149	TPK1	Effector memeory CD4 T cell
150	UQCRB	Effector memeory CD4 T cell
151	USP9Y	Effector memeory CD4 T cell
152	WIPF1	Effector memeory CD4 T cell
153	ZCRB1	Effector memeory CD4 T cell
154	ACAP1	Effector memeory CD8 T cell
155	APOL3	Effector memeory CD8 T cell
156	ARHGAP10	Effector memeory CD8 T cell
157	ATP10D	Effector memeory CD8 T cell
158	C3AR1	Effector memeory CD8 T cell
159	CCR5	Effector memeory CD8 T cell
160	CD160	Effector memeory CD8 T cell
161	CD55	Effector memeory CD8 T cell
162	CFLAR	Effector memeory CD8 T cell
163	CMKLR1	Effector memeory CD8 T cell
164	DAPP1	Effector memeory CD8 T cell
165	FCRL6	Effector memeory CD8 T cell
166	FLT3LG	Effector memeory CD8 T cell
167	GZMM	Effector memeory CD8 T cell
168	HAPLN3	Effector memeory CD8 T cell
169	HLA-DMB	Effector memeory CD8 T cell
170	HLA-DPA1	Effector memeory CD8 T cell
171	HLA-DPB1	Effector memeory CD8 T cell
172	IFI16	Effector memeory CD8 T cell
173	LIME1	Effector memeory CD8 T cell
174	LTK	Effector memeory CD8 T cell
175	NFKBIA	Effector memeory CD8 T cell
176	SETD7	Effector memeory CD8 T cell
177	SIK1	Effector memeory CD8 T cell
178	TRIB2	Effector memeory CD8 T cell
179	ACP5	Gamma delta T cell
180	AQP9	Gamma delta T cell
181	BTN3A2	Gamma delta T cell
182	C1orf54	Gamma delta T cell
183	CARD8	Gamma delta T cell
184	CCL18	Gamma delta T cell
185	CD209	Gamma delta T cell
186	CD33	Gamma delta T cell
187	CD36	Gamma delta T cell
188	CDK5	Gamma delta T cell
189	IL10RB	Gamma delta T cell
190	KLRF1	Gamma delta T cell
191	LGALS1	Gamma delta T cell
192	MAPK7	Gamma delta T cell
193	KLHL7	Gamma delta T cell
194	KRT80	Gamma delta T cell
195	LAMC1	Gamma delta T cell
196	LCORL	Gamma delta T cell
197	LMNB1	Gamma delta T cell
198	MEIS3P1	Gamma delta T cell
199	MPL	Gamma delta T cell
200	FABP1	Gamma delta T cell
201	FABP5	Gamma delta T cell
202	FADD	Gamma delta T cell
203	MFAP3L	Gamma delta T cell
204	MINPP1	Gamma delta T cell
205	RPS24	Gamma delta T cell
206	RPS7	Gamma delta T cell
207	RPS9	Gamma delta T cell
208	DBNL	Gamma delta T cell
209	CCL13	Gamma delta T cell
210	CD22	Immature B cell
211	CYBB	Immature B cell
212	FAM129C	Immature B cell
213	FCRL1	Immature B cell
214	FCRL3	Immature B cell
215	FCRL5	Immature B cell
216	FCRLA	Immature B cell
217	HDAC9	Immature B cell
218	HLA-DQA1	Immature B cell
219	HVCN1	Immature B cell
220	KIAA0226	Immature B cell
221	NCF1	Immature B cell
222	NCF1B	Immature B cell
223	P2RY10	Immature B cell
224	SP100	Immature B cell
225	TXNIP	Immature B cell
226	STAP1	Immature B cell
227	TAGAP	Immature B cell
228	ZCCHC2	Immature B cell
229	AICDA	Memory B cell
230	CCNA2	Memory B cell
231	CDKN3	Memory B cell
232	CLCN5	Memory B cell
233	ENPP1	Memory B cell
234	FCER1A	Memory B cell
235	FCRL4	Memory B cell
236	MYC	Memory B cell
237	RUNX2	Memory B cell
238	SORL1	Memory B cell
239	SOX5	Memory B cell
240	STAT5A	Memory B cell
241	STAT5B	Memory B cell
242	TLR9	Memory B cell
243	CCL3L1	Regulatory T cell
244	CD72	Regulatory T cell
245	CLEC5A	Regulatory T cell
246	FOXP3	Regulatory T cell
247	ITGA4	Regulatory T cell
248	L1CAM	Regulatory T cell
249	LIPA	Regulatory T cell
250	LRP1	Regulatory T cell
251	LRRC42	Regulatory T cell
252	MARCO	Regulatory T cell
253	MMP12	Regulatory T cell
254	MNDA	Regulatory T cell
255	MRC1	Regulatory T cell
256	MS4A6A	Regulatory T cell
257	PELO	Regulatory T cell
258	PLEK	Regulatory T cell
259	PRSS23	Regulatory T cell
260	PTGIR	Regulatory T cell
261	ST8SIA4	Regulatory T cell
262	STAB1	Regulatory T cell
263	B3GAT1	T follicular helper cell
264	CDK5R1	T follicular helper cell
265	PDCD1	T follicular helper cell
266	BCL6	T follicular helper cell
267	CD200	T follicular helper cell
268	CD83	T follicular helper cell
269	CD84	T follicular helper cell
270	FGF2	T follicular helper cell
271	GPR18	T follicular helper cell
272	CEBPA	T follicular helper cell
273	CECR1	T follicular helper cell
274	CLEC10A	T follicular helper cell
275	CLEC4A	T follicular helper cell
276	CSF1R	T follicular helper cell
277	CTSS	T follicular helper cell
278	DMN	T follicular helper cell
279	DPP4	T follicular helper cell
280	LRRC32	T follicular helper cell
281	MC5R	T follicular helper cell
282	MICA	T follicular helper cell
283	NCAM1	T follicular helper cell
284	NCR2	T follicular helper cell
285	NRP1	T follicular helper cell
286	PDCD1LG2	T follicular helper cell
287	PDCD6	T follicular helper cell
288	PRDX1	T follicular helper cell
289	RAE1	T follicular helper cell
290	RAET1E	T follicular helper cell
291	SIGLEC7	T follicular helper cell
292	SIGLEC9	T follicular helper cell
293	TYRO3	T follicular helper cell
294	CHST12	T follicular helper cell
295	CLIC3	T follicular helper cell
296	IVNS1ABP	T follicular helper cell
297	KIR2DL2	T follicular helper cell
298	LGMN	T follicular helper cell
299	CD70	Type 1 T helper cell
300	TBX21	Type 1 T helper cell
301	ADAM8	Type 1 T helper cell
302	AHCYL2	Type 1 T helper cell
303	ALCAM	Type 1 T helper cell
304	B3GALNT1	Type 1 T helper cell
305	BBS12	Type 1 T helper cell
306	BST1	Type 1 T helper cell
307	CD151	Type 1 T helper cell
308	CD47	Type 1 T helper cell
309	CD48	Type 1 T helper cell
310	CD52	Type 1 T helper cell
311	CD53	Type 1 T helper cell
312	CD59	Type 1 T helper cell
313	CD6	Type 1 T helper cell
314	CD68	Type 1 T helper cell
315	CD7	Type 1 T helper cell
316	CD96	Type 1 T helper cell
317	CFHR3	Type 1 T helper cell
318	CHRM3	Type 1 T helper cell
319	CLEC7A	Type 1 T helper cell
320	COL23A1	Type 1 T helper cell
321	COL4A4	Type 1 T helper cell
322	COL5A3	Type 1 T helper cell
323	DAB1	Type 1 T helper cell
324	DLEU7	Type 1 T helper cell
325	DOC2B	Type 1 T helper cell
326	EMP1	Type 1 T helper cell
327	F12	Type 1 T helper cell
328	FURIN	Type 1 T helper cell
329	GAB3	Type 1 T helper cell
330	GATM	Type 1 T helper cell
331	GFPT2	Type 1 T helper cell
332	GPR25	Type 1 T helper cell
333	GREM2	Type 1 T helper cell
334	HAVCR1	Type 1 T helper cell
335	HSD11B1	Type 1 T helper cell
336	HUNK	Type 1 T helper cell
337	IGF2	Type 1 T helper cell
338	RCSD1	Type 1 T helper cell
339	RYR1	Type 1 T helper cell
340	SAV1	Type 1 T helper cell
341	SELE	Type 1 T helper cell
342	SELP	Type 1 T helper cell
343	SH3KBP1	Type 1 T helper cell
344	SIT1	Type 1 T helper cell
345	SLC35B3	Type 1 T helper cell
346	SIGLEC10	Type 1 T helper cell
347	SKAP1	Type 1 T helper cell
348	THUMPD2	Type 1 T helper cell
349	TIGIT	Type 1 T helper cell
350	ZEB2	Type 1 T helper cell
351	ENC1	Type 1 T helper cell
352	FAM134B	Type 1 T helper cell
353	FBXO30	Type 1 T helper cell
354	FCGR2C	Type 1 T helper cell
355	STAC	Type 1 T helper cell
356	LTC4S	Type 1 T helper cell
357	MAN1B1	Type 1 T helper cell
358	MDH1	Type 1 T helper cell
359	MMD	Type 1 T helper cell
360	RGS16	Type 1 T helper cell
361	IL12A	Type 1 T helper cell
362	P2RX5	Type 1 T helper cell
363	CD97	Type 1 T helper cell
364	ITGB4	Type 1 T helper cell
365	ICAM3	Type 1 T helper cell
366	METRNL	Type 1 T helper cell
367	TNFRSF1A	Type 1 T helper cell
368	IRF1	Type 1 T helper cell
369	HTR2B	Type 1 T helper cell
370	CALD1	Type 1 T helper cell
371	MOCOS	Type 1 T helper cell
372	TRAF3IP2	Type 1 T helper cell
373	TLR8	Type 1 T helper cell
374	TRAF1	Type 1 T helper cell
375	DUSP14	Type 1 T helper cell
376	IL17A	Type 17 T helper cell
377	IL17RA	Type 17 T helper cell
378	C2CD4A	Type 17 T helper cell
379	C2CD4B	Type 17 T helper cell
380	CA2	Type 17 T helper cell
381	CCDC65	Type 17 T helper cell
382	CEACAM3	Type 17 T helper cell
383	IL17C	Type 17 T helper cell
384	IL17F	Type 17 T helper cell
385	IL17RC	Type 17 T helper cell
386	IL17RE	Type 17 T helper cell
387	IL23A	Type 17 T helper cell
388	ILDR1	Type 17 T helper cell
389	LONRF3	Type 17 T helper cell
390	SH2D6	Type 17 T helper cell
391	TNIP2	Type 17 T helper cell
392	ABCA1	Type 17 T helper cell
393	ABCB1	Type 17 T helper cell
394	ADAMTS12	Type 17 T helper cell
395	ANK1	Type 17 T helper cell
396	ANKRD22	Type 17 T helper cell
397	B3GALT2	Type 17 T helper cell
398	CAMTA1	Type 17 T helper cell
399	CCR9	Type 17 T helper cell
400	CD40	Type 17 T helper cell
401	GPR44	Type 17 T helper cell
402	IFT80	Type 17 T helper cell
403	ASB2	Type 2 T helper cell
404	CSRP2	Type 2 T helper cell
405	DAPK1	Type 2 T helper cell
406	DLC1	Type 2 T helper cell
407	DNAJC12	Type 2 T helper cell
408	DUSP6	Type 2 T helper cell
409	GNAI1	Type 2 T helper cell
410	LAMP3	Type 2 T helper cell
411	NRP2	Type 2 T helper cell
412	OSBPL1A	Type 2 T helper cell
413	PDE4B	Type 2 T helper cell
414	PHLDA1	Type 2 T helper cell
415	PLA2G4A	Type 2 T helper cell
416	RAB27B	Type 2 T helper cell
417	RBMS3	Type 2 T helper cell
418	RNF125	Type 2 T helper cell
419	TMPRSS3	Type 2 T helper cell
420	GATA3	Type 2 T helper cell
421	BIRC5	Type 2 T helper cell
422	CDC25C	Type 2 T helper cell
423	CDC7	Type 2 T helper cell
424	CENPF	Type 2 T helper cell
425	CXCR6	Type 2 T helper cell
426	DHFR	Type 2 T helper cell
427	EVI5	Type 2 T helper cell
428	GSTA4	Type 2 T helper cell
429	HELLS	Type 2 T helper cell
430	IL26	Type 2 T helper cell
431	LAIR2	Type 2 T helper cell
432	ABCD1	Activated dendritic cell
433	C1QC	Activated dendritic cell
434	CAPG	Activated dendritic cell
435	CCL3L3	Activated dendritic cell
436	CD207	Activated dendritic cell
437	CD302	Activated dendritic cell
438	ATP5B	Activated dendritic cell
439	ATP5L	Activated dendritic cell
440	ATP6V1A	Activated dendritic cell
441	BCL2L1	Activated dendritic cell
442	C1QB	Activated dendritic cell
443	SNURF	Activated dendritic cell
444	SPCS3	Activated dendritic cell
445	CCNA1	Activated dendritic cell
446	CEACAM8	Activated dendritic cell
447	NOS2	Activated dendritic cell
448	SRA1	Activated dendritic cell
449	TNFRSF6B	Activated dendritic cell
450	TREM1	Activated dendritic cell
451	TREML1	Activated dendritic cell
452	RHOA	Activated dendritic cell
453	SLC25A37	Activated dendritic cell
454	TNFSF14	Activated dendritic cell
455	TREML4	Activated dendritic cell
456	VNN2	Activated dendritic cell
457	XPO6	Activated dendritic cell
458	CLEC4C	Activated dendritic cell
459	TNFAIP2	Activated dendritic cell
460	UBD	Activated dendritic cell
461	ACTR3	Activated dendritic cell
462	RAB1A	Activated dendritic cell
463	SLA	Activated dendritic cell
464	HLA-DQA2	Activated dendritic cell
465	SIGLEC5	Activated dendritic cell
466	SLAMF9	Activated dendritic cell
467	ABAT	CD56bright natural killer cell
468	C11orf75	CD56bright natural killer cell
469	C5orf15	CD56bright natural killer cell
470	CDHR1	CD56bright natural killer cell
471	DCAF12	CD56bright natural killer cell
472	DYNLL1	CD56bright natural killer cell
473	GPR137B	CD56bright natural killer cell
474	HCP5	CD56bright natural killer cell
475	HDGFRP2	CD56bright natural killer cell
476	KRT86	CD56bright natural killer cell
477	MLST8	CD56bright natural killer cell
478	ELMOD3	CD56bright natural killer cell
479	ENTPD5	CD56bright natural killer cell
480	FAM119A	CD56bright natural killer cell
481	FAM179A	CD56bright natural killer cell
482	CLIC2	CD56bright natural killer cell
483	COX7A2L	CD56bright natural killer cell
484	CREB3L4	CD56bright natural killer cell
485	CSF1	CD56bright natural killer cell
486	CSNK2A2	CD56bright natural killer cell
487	CSTA	CD56bright natural killer cell
488	CSTB	CD56bright natural killer cell
489	CTPS	CD56bright natural killer cell
490	CTSD	CD56bright natural killer cell
491	FST	CD56bright natural killer cell
492	GATA2	CD56bright natural killer cell
493	GMPR	CD56bright natural killer cell
494	HDC	CD56bright natural killer cell
495	HEY1	CD56bright natural killer cell
496	HOXA1	CD56bright natural killer cell
497	HS2ST1	CD56bright natural killer cell
498	HS3ST1	CD56bright natural killer cell
499	BCL11B	CD56bright natural killer cell
500	CDH3	CD56bright natural killer cell
501	MYL6B	CD56bright natural killer cell
502	NAA16	CD56bright natural killer cell
503	ClQA	CD56bright natural killer cell
504	ClQB	CD56bright natural killer cell
505	CYP27B1	CD56bright natural killer cell
506	EIF3M	CD56bright natural killer cell
507	CYP27A1	CD56dim natural killer cell
508	DDX55	CD56dim natural killer cell
509	DYRK2	CD56dim natural killer cell
510	RPL37A	CD56dim natural killer cell
511	NOTCH3	CD56dim natural killer cell
512	AKR7A3	CD56dim natural killer cell
513	GPRC5C	CD56dim natural killer cell
514	GRIN1	CD56dim natural killer cell
515	HLA-E	CD56dim natural killer cell
516	PORCN	CD56dim natural killer cell
517	PSMC4	CD56dim natural killer cell
518	UPP1	CD56dim natural killer cell
519	IL21R	CD56dim natural killer cell
520	KIR2DS1	CD56dim natural killer cell
521	KIR2DS2	CD56dim natural killer cell
522	KIR2DS5	CD56dim natural killer cell
523	GIPR	Eosinophil
524	KRT18P50	Eosinophil
525	LRMP	Eosinophil
526	FOSB	Eosinophil
527	RRP12	Eosinophil
528	GPR183	Eosinophil
529	NR4A3	Eosinophil
530	ST3GAL6	Eosinophil
531	DEPDC5	Eosinophil
532	PDE6C	Eosinophil
533	PKD2L2	Eosinophil
534	GPR65	Eosinophil
535	IL5RA	Eosinophil
536	P2RY14	Eosinophil
537	DACH1	Eosinophil
538	DAPK2	Eosinophil
539	EMR3	Eosinophil
540	ACADM	Immature dendritic cell
541	AHCYL1	Immature dendritic cell
542	ALDH1A2	Immature dendritic cell
543	ALDH3A2	Immature dendritic cell
544	ALDH9A1	Immature dendritic cell
545	ALOX15	Immature dendritic cell
546	AMT	Immature dendritic cell
547	ARL1	Immature dendritic cell
548	ATIC	Immature dendritic cell
549	ATP5A1	Immature dendritic cell
550	CAPZA1	Immature dendritic cell
551	LILRA5	Immature dendritic cell
552	RDX	Immature dendritic cell
553	RRAGD	Immature dendritic cell
554	TACSTD2	Immature dendritic cell
555	INPP5F	Immature dendritic cell
556	RAB38	Immature dendritic cell
557	PLAU	Immature dendritic cell
558	CSF3R	Immature dendritic cell
559	SLC18A2	Immature dendritic cell
560	AMPD2	Immature dendritic cell
561	CLTB	Immature dendritic cell
562	C1orf162	Immature dendritic cell
563	AIF1	Macrophage
564	CCL1	Macrophage
565	CCL14	Macrophage
566	CCL23	Macrophage
567	CCL26	Macrophage
568	CD300LB	Macrophage
569	CNR1	Macrophage
570	CNR2	Macrophage
571	EIF1	Macrophage
572	EIF4A1	Macrophage
573	FPR1	Macrophage
574	FPR2	Macrophage
575	FRAT2	Macrophage
576	GPR27	Macrophage
577	GPR77	Macrophage
578	RNASE2	Macrophage
579	MS4A2	Macrophage
580	BASP1	Macrophage
581	IGSF6	Macrophage
582	HK3	Macrophage
583	VNN1	Macrophage
584	FES	Macrophage
585	NPL	Macrophage
586	FZD2	Macrophage
587	FAM198B	Macrophage
588	HNMT	Macrophage
589	SLC15A3	Macrophage
590	CD4	Macrophage
591	TXNDC3	Macrophage
592	FRMD4A	Macrophage
593	CRYBB1	Macrophage
594	HRH1	Macrophage
595	WNT5B	Macrophage
596	ADAMTS3	Mast cell
597	CPA3	Mast cell
598	CMA1	Mast cell
599	CTSG	Mast cell
600	ARHGAP15	Mast cell
601	CPM	Mast cell
602	FCN1	Mast cell
603	FTL	Mast cell
604	HSPA6	Mast cell
605	ITGA9	Mast cell
606	RNASE3	Mast cell
607	S100A4	Mast cell
608	SIGLEC8	Mast cell
609	SLC6A4	Mast cell
610	PTGS2	Mast cell
611	EGR3	Mast cell
612	PILRA	Mast cell
613	CCR2	MDSC
614	CD14	MDSC
615	CD2	MDSC
616	CD86	MDSC
617	CXCR4	MDSC
618	FCGR2A	MDSC
619	FCGR2B	MDSC
620	FCGR3A	MDSC
621	FERMT3	MDSC
622	GPSM3	MDSC
623	IL18BP	MDSC
624	IL4R	MDSC
625	ITGAL	MDSC
626	ITGAM	MDSC
627	PARVG	MDSC
628	PSAP	MDSC
629	PTGER2	MDSC
630	PTGES2	MDSC
631	S100A8	MDSC
632	S100A9	MDSC
633	ASGR2	Monocyte
634	CFP	Monocyte
635	ASGR1	Monocyte
636	CD1D	Monocyte
637	UPK3A	Monocyte
638	ACTG1	Monocyte
639	ANXA5	Monocyte
640	ATP6V1B2	Monocyte
641	CFL1	Monocyte
642	DAZAP2	Monocyte
643	CTBS	Monocyte
644	EMR4P	Monocyte
645	HIVEP2	Monocyte
646	MARCKSL1	Monocyte
647	MBP	Monocyte
648	MMP15	Monocyte
649	PNPLA6	Monocyte
650	TMBIM6	Monocyte
651	PQBP1	Monocyte
652	TEX264	Monocyte
653	IKZF1	Monocyte
654	AKT3	Natural killer cell
655	AXL	Natural killer cell
656	BST2	Natural killer cell
657	CDH2	Natural killer cell
658	CRTAM	Natural killer cell
659	CSF2RA	Natural killer cell
660	CTSZ	Natural killer cell
661	CXCL1	Natural killer cell
662	CYTH1	Natural killer cell
663	DAXX	Natural killer cell
664	DGKH	Natural killer cell
665	DLL4	Natural killer cell
666	DPYD	Natural killer cell
667	ERBB3	Natural killer cell
668	F11R	Natural killer cell
669	FAM27A	Natural killer cell
670	FAM49A	Natural killer cell
671	FASLG	Natural killer cell
672	FCGR1A	Natural killer cell
673	FN1	Natural killer cell
674	FSTL1	Natural killer cell
675	FUCA1	Natural killer cell
676	GBP3	Natural killer cell
677	GLS2	Natural killer cell
678	GRB2	Natural killer cell
679	LST1	Natural killer cell
680	BCL2	Natural killer cell
681	CDC5L	Natural killer cell
682	FGF18	Natural killer cell
683	FUT5	Natural killer cell
684	FZR1	Natural killer cell
685	GAGE2	Natural killer cell
686	IGFBP5	Natural killer cell
687	KANK2	Natural killer cell
688	LDB3	Natural killer cell
689	BTN2A2	Natural killer T cell
690	CD101	Natural killer T cell
691	CD109	Natural killer T cell
692	CNPY3	Natural killer T cell
693	CNPY4	Natural killer T cell
694	CREB1	Natural killer T cell
695	CRTC2	Natural killer T cell
696	CRTC3	Natural killer T cell
697	CSF2	Natural killer T cell
698	KLRC1	Natural killer T cell
699	FUT4	Natural killer T cell
700	ICAM2	Natural killer T cell
701	IL32	Natural killer T cell
702	LAMP2	Natural killer T cell
703	LILRB5	Natural killer T cell
704	KLRG1	Natural killer T cell
705	HSPA4	Natural killer T cell
706	HSPB6	Natural killer T cell
707	ISM2	Natural killer T cell
708	ITIH2	Natural killer T cell
709	KDM4C	Natural killer T cell
710	KIR2DS4	Natural killer T cell
711	KIRREL3	Natural killer T cell
712	SDCBP	Natural killer T cell
713	NFATC2IP	Natural killer T cell
714	MICB	Natural killer T cell
715	KIR2DL1	Natural killer T cell
716	KIR2DL3	Natural killer T cell
717	KIR3DL1	Natural killer T cell
718	KIR3DL2	Natural killer T cell
719	NCR1	Natural killer T cell
720	FOSL1	Natural killer T cell
721	TSLP	Natural killer T cell
722	SLC7A7	Natural killer T cell
723	SPP1	Natural killer T cell
724	TREM2	Natural killer T cell
725	UBASH3A	Natural killer T cell
726	YBX2	Natural killer T cell
727	CCDC88A	Natural killer T cell
728	CLEC1A	Natural killer T cell
729	THBD	Natural killer T cell
730	PDPN	Natural killer T cell
731	VCAM1	Natural killer T cell
732	EMR1	Natural killer T cell
733	CREB5	Neutrophil
734	CDA	Neutrophil
735	CHST15	Neutrophil
736	S100A12	Neutrophil
737	APOBEC3A	Neutrophil
738	CASP5	Neutrophil
739	MMP25	Neutrophil
740	HAL	Neutrophil
741	C1orf183	Neutrophil
742	FFAR2	Neutrophil
743	MAK	Neutrophil
744	CXCR1	Neutrophil
745	STEAP4	Neutrophil
746	MGAM	Neutrophil
747	BTNL8	Neutrophil
748	CXCR2	Neutrophil
749	TNFRSF10C	Neutrophil
750	VNN3	Neutrophil
751	CBX6	Plasmacytoid dendritic cell
752	DAB2	Plasmacytoid dendritic cell
753	DDX17	Plasmacytoid dendritic cell
754	HIGD1A	Plasmacytoid dendritic cell
755	IDH3A	Plasmacytoid dendritic cell
756	IL3RA	Plasmacytoid dendritic cell
757	MAGED1	Plasmacytoid dendritic cell
758	NUCB2	Plasmacytoid dendritic cell
759	OFD1	Plasmacytoid dendritic cell
760	OGT	Plasmacytoid dendritic cell
761	PDIA4	Plasmacytoid dendritic cell
762	SERTAD2	Plasmacytoid dendritic cell
763	SIRPA	Plasmacytoid dendritic cell
764	TMED2	Plasmacytoid dendritic cell
765	ENG	Plasmacytoid dendritic cell
766	FCAR	Plasmacytoid dendritic cell
767	IGF1	Plasmacytoid dendritic cell
768	ITGA2B	Plasmacytoid dendritic cell
769	GABARAP	Plasmacytoid dendritic cell
770	GPX1	Plasmacytoid dendritic cell
771	KRT23	Plasmacytoid dendritic cell
772	PROK2	Plasmacytoid dendritic cell
773	RALB	Plasmacytoid dendritic cell
774	RETNLB	Plasmacytoid dendritic cell
775	RNF141	Plasmacytoid dendritic cell
776	SEC14L1	Plasmacytoid dendritic cell
777	SEPX1	Plasmacytoid dendritic cell
778	EMP3	Plasmacytoid dendritic cell
779	CD300LF	Plasmacytoid dendritic cell
780	ABTB1	Plasmacytoid dendritic cell
781	KLHL21	Plasmacytoid dendritic cell
782	PHRF1	Plasmacytoid dendritic cell
