# Supplementary material for: Subtyping of microsatellite stability colorectal cancer reveals guanylate binding protein 2 (GBP2) as a potential immunotherapeutic target
Source: J Immunother Cancer. 2022 Apr 5;10(4):e004302. doi: 10.1136/jitc-2021-004302 (PMC8984016; doi:10.1136/jitc-2021-004302)
Supplement: Supplementary data [file jitc-2021-004302supp011.xlsx]

## Sheet: immunecyclegeneset
	Metagene	Cell.type
1	IL10	1Multiple
2	TGFB1	1Multiple
3	HMGB1	1Multiple
4	ANXA1	1Multiple
5	CALR	1Multiple
6	CXCL10	1Multiple
7	PDIA3	1Multiple
8	HSPA1A	1Multiple
9	HSPA1B	1Multiple
10	HSPA2	1Multiple
11	HSPA8	1Multiple
12	HSPA4	1Multiple
13	HSPA14	1Multiple
14	HSPA5	1Multiple
15	HSPA6	1Multiple
16	HSPA9	1Multiple
17	HSPA13	1Multiple
18	HSPA7	1Multiple
19	HSPA8	1Multiple
20	HSPA12A	1Multiple
21	HSPA12B	1Multiple
22	HSP90AA1	1Multiple
23	HSP90AB1	1Multiple
24	HSP90B1	1Multiple
25	IFNA2	1Multiple
26	IFNA1	1Multiple
27	IFNA13	1Multiple
28	IFNA6	1Multiple
29	IFNA21	1Multiple
30	IFNA4	1Multiple
31	IFNA8	1Multiple
32	IFNA5	1Multiple
33	IFNA7	1Multiple
34	IFNA14	1Multiple
35	IFNA16	1Multiple
36	IFNA10	1Multiple
37	IFNA17	1Multiple
38	IFNB1	1Multiple
39	IFNE	1Multiple
40	IFNW1	1Multiple
41	TNF	2Multiple
42	IL1A	2Multiple
43	IL1B	2Multiple
44	IFNA2	2Multiple
45	IFNA1	2Multiple
46	IFNA13	2Multiple
47	IFNA6	2Multiple
48	IFNA21	2Multiple
49	IFNA4	2Multiple
50	IFNA8	2Multiple
51	IFNA5	2Multiple
52	IFNA7	2Multiple
53	IFNA14	2Multiple
54	IFNA16	2Multiple
55	IFNA10	2Multiple
56	IFNA17	2Multiple
57	CD40LG	2Multiple
58	CD40	2Multiple
59	NT5C	2Multiple
60	HMGB1	2Multiple
61	TLR1	2Multiple
62	TLR2	2Multiple
63	TLR3	2Multiple
64	TLR4	2Multiple
65	TLR5	2Multiple
66	TLR6	2Multiple
67	TLR7	2Multiple
68	TLR8	2Multiple
69	TLR9	2Multiple
70	TLR10	2Multiple
71	HLAA	2Multiple
72	B2M	2Multiple
73	TAP1	2Multiple
74	IL10	2Multiple
75	IL4	2Multiple
76	IL13	2Multiple
77	CD3D	3Multiple
78	CD3E	3Multiple
79	CD3G	3Multiple
80	CD247	3Multiple
81	CD28	3Multiple
82	TNFRSF9	3Multiple
83	TNFSF9	3Multiple
84	TNFRSF4	3Multiple
85	TNFSF4	3Multiple
86	CD27	3Multiple
87	CD70	3Multiple
88	TNFRSF14	3Multiple
89	TNFSF14	3Multiple
90	CD40	3Multiple
91	CD40LG	3Multiple
92	TNFRSF18	3Multiple
93	TNFSF18	3Multiple
94	TNFRSF25	3Multiple
95	TNFSF15	3Multiple
96	TNFRSF8	3Multiple
97	TNFSF8	3Multiple
98	HAVCR1	3Multiple
99	TIMD4	3Multiple
100	SLAMF7	3Multiple
101	SLAMF6	3Multiple
102	SLAMF1	3Multiple
103	SLAMF9	3Multiple
104	SLAMF8	3Multiple
105	CD2	3Multiple
106	CD48	3Multiple
107	CD58	3Multiple
108	CD226	3Multiple
109	ICOS	3Multiple
110	ICOSLG	3Multiple
111	KLRK1	3Multiple
112	MICA	3Multiple
113	MICB	3Multiple
114	RAET1E	3Multiple
115	RAET1G	3Multiple
116	CRTAM	3Multiple
117	CADM1	3Multiple
118	CTLA4	3Multiple
119	PDCD1	3Multiple
120	PDCD1LG2	3Multiple
121	CD274	3Multiple
122	CD160	3Multiple
123	TNFRSF14	3Multiple
124	BTLA	3Multiple
125	VSIR	3Multiple
126	LAIR1	3Multiple
127	HAVCR1	3Multiple
128	HAVCR2	3Multiple
129	LGALS9	3Multiple
130	TIMD4	3Multiple
131	CD244	3Multiple
132	CD48	3Multiple
133	TIGIT	3Multiple
134	NECTIN3	3Multiple
135	LAG3	3Multiple
136	IL2	3Multiple
137	IL12A	3Multiple
138	IL12B	3Multiple
139	CXCR5	4Bcell
140	CXCL13	4Bcell
141	CCL24	4Basophil
142	CCL26	4Basophil
143	CCL19	4CD4tcell
144	CX3CL1	4CD4tcell
145	CXCL16	4CD4tcell
146	CCR5	4CD8tcell
147	CXCR3	4CD8tcell
148	CXCL10	4CD8tcell
149	CXCL9	4CD8tcell
150	CCL20	4CD8tcell
151	CXCL11	4CD8tcell
152	CX3CL1	4CD8tcell
153	CXCL16	4CD8tcell
154	CCR7	4Dendriticcell
155	CCL3	4Dendriticcell
156	CCL4	4Dendriticcell
157	CCL5	4Dendriticcell
158	CCL21	4Dendriticcell
159	CCL11	4Eosinophil
160	CCL24	4Eosinophil
161	CCL26	4Eosinophil
162	CSF1	4Macrophage
163	CCL2	4Macrophage
164	CCL3	4Macrophage
165	CCL4	4Macrophage
166	CCL5	4Macrophage
167	CXCR2	4MDSC
168	CXCL5	4MDSC
169	CCL2	4Monocyte
170	CCL7	4Monocyte
171	CX3CL1	4Monocyte
172	CXCL1	4Neutrophil
173	CXCL2	4Neutrophil
174	CXCL3	4Neutrophil
175	CXCL8	4Neutrophil
176	CXCL6	4Neutrophil
177	CXCL5	4Neutrophil
178	CXCR3	4NKcell
179	CXCL10	4NKcell
180	CXCL9	4NKcell
181	CCL3	4NKcell
182	CCL4	4NKcell
183	CCL5	4NKcell
184	CXCL11	4NKcell
185	CX3CL1	4NKcell
186	CXCR5	4Tcell
187	CCR7	4Tcell
188	CXCL9	4Tcell
189	CCL3	4Tcell
190	CCL4	4Tcell
191	CCL5	4Tcell
192	CCL19	4Tcell
193	CCL21	4Tcell
194	CX3CL1	4Tcell
195	CXCL13	4Tcell
196	CXCR3	4TH1cell
197	CXCL10	4TH1cell
198	CXCL9	4TH1cell
199	CXCL11	4TH1cell
200	CCR6	4TH17cell
201	CCL20	4TH17cell
202	CXCL12	4TH17cell
203	CXCR4	4TH17cell
204	CCL1	4Th2cell
205	CCL17	4Th2cell
206	CCL22	4Th2cell
207	CCR6	4TH22cell
208	CCL20	4TH22cell
209	CCR4	4Tregcell
210	CCR10	4Tregcell
211	CCL1	4Tregcell
212	CCL17	4Tregcell
213	CCL22	4Tregcell
214	CCL28	4Tregcell
215	STAT1	5Tcell
216	IRF5	5Tcell
217	KLF2	5Tcell
218	ITGB2	5Tcell
219	ICAM1	5Tcell
220	EZH2	5Tcell
221	DNMT1	5Tcell
222	VEGFA	5Tcell
223	EDNRB	5Tcell
224	CD28	6Multiple
225	ICOS	6Multiple
226	ICOSLG	6Multiple
227	TNFRSF9	6Multiple
228	TNFSF9	6Multiple
229	CD27	6Multiple
230	CD70	6Multiple
231	TNFRSF4	6Multiple
232	TNFSF4	6Multiple
233	TNFSF14	6Multiple
234	CD40	6Multiple
235	CD40LG	6Multiple
236	HLAA	6Multiple
237	B2M	6Multiple
238	TAP1	6Multiple
239	BIRC5	6Multiple
240	MDM2	6Multiple
241	MAGEA4	6Multiple
242	TP53	6Multiple
243	PDCD1	6Multiple
244	PDCD1LG2	6Multiple
245	CD274	6Multiple
246	CTLA4	6Multiple
247	BTLA	6Multiple
248	VTCN1	6Multiple
249	IFNG	7Multiple
250	GZMB	7Multiple
251	PRF1	7Multiple
252	PDCD1	7Multiple
253	SMC3	7Multiple
254	VTCN1	7Multiple
255	HAVCR2	7Multiple
256	MICA	7Multiple
257	MICB	7Multiple
258	BTLA	7Multiple
259	VSIR	7Multiple
260	LAG3	7Multiple
261	IDO1	7Multiple
262	IDO2	7Multiple
263	ARG1	7Multiple
264	ARG2	7Multiple
265	NOS1	7Multiple
266	NOS2	7Multiple
267	NOS3	7Multiple
268	TGFB1	7Multiple
269	IL10	7Multiple
270	CCL28	7Multiple
271	CXCL12	7Multiple
272	CCL2	7Multiple
273	CXCL8	7Multiple
